1 **Title:** Inferring species interactions from co-occurrence data with Markov networks

2 **Author:** David J. Harris: Population Biology; 1 Shields Avenue, Davis CA, 95616

3 **Abstract:** Inferring species interactions from co-occurrence data is one of the most  
4 controversial tasks in community ecology. One difficulty is that a single pairwise interaction  
5 can ripple through an ecological network and produce surprising indirect consequences. For  
6 example, the negative correlation between two competing species can be reversed in the  
7 presence of a third species that is capable of outcompeting both of them. Here, I apply  
8 models from statistical physics, called Markov networks or Markov random fields, that can  
9 predict the direct and indirect consequences of any possible species interaction matrix.

10 Interactions in these models can also be estimated from observed co-occurrence rates via  
11 maximum likelihood, controlling for indirect effects. Using simulated landscapes with known  
12 pairwise interaction strengths, I evaluated Markov networks and six existing approaches.

13 The Markov networks consistently outperformed other methods, correctly isolating direct  
14 interactions between species pairs even when indirect interactions or abiotic factors largely  
15 overpowered them. Two computationally efficient approximations, based on controlling for  
16 indirect effects with linear or generalized linear models, also performed well. Indirect effects  
17 reliably caused a common null modeling approach to produce incorrect inferences, however.

18 **Key words:** Ecological interactions; Occurrence data; Species associations; Markov network;  
19 Markov random field; Ising model; Biogeography; Presence–absence matrix; Null model

## 20 **Introduction**

21 To the extent that nontrophic species interactions (such as competition) affect community  
22 assembly, ecologists might expect to find signatures of these interactions in species  
23 composition data (MacArthur 1958, Diamond 1975). Despite decades of work and several

## *Inferring species interactions*

24 major controversies, however (Lewin 1983, Strong et al. 1984, Connor et al. 2013), existing  
25 methods for detecting competition's effects on community structure are unreliable (Gotelli  
26 and Ulrich 2009). In particular, species' effects on one another can become lost in a web of  
27 indirect effects. For example, the competitive interaction between the two shrub species in  
28 Figure 1A is obscured by their shared tendency to occur in unshaded areas (Figure 1B).  
29 While ecologists have long known that indirect effects can overwhelm direct ones at the  
30 landscape level (Levine 1976), the vast majority of our methods for drawing inferences from  
31 observational data do not control for these effects (e.g. Diamond 1975, Strong et al. 1984,  
32 Gotelli and Ulrich 2009, Veech 2013, Pollock et al. 2014). To the extent that indirect  
33 interactions like those in Figure 1 are generally important, existing methods will not provide  
34 much evidence regarding species interactions.

35 While competition doesn't reliably reduce co-occurrence rates at the whole-landscape  
36 level (as most methods assume), it does still leave a signal in the data (Figure 1C). For  
37 example, after partitioning the data set into shaded and unshaded sites, there will be  
38 co-occurrence deficits in each subset that wouldn't otherwise be apparent. More generally,  
39 controlling for other species in the network will often be important for obtaining reliable  
40 estimates of direct (conditional, or all-else-equal) effects. This kind of precision is difficult to  
41 obtain from null models, which only test the most extreme possible hypothesis: that *all*  
42 direct and indirect interactions are exactly zero. Nevertheless, null models have dominated  
43 this field for more than three decades (Strong et al. 1984, Gotelli and Ulrich 2009).

44 Following Azaele et al. (2010), this paper shows that Markov networks (undirected  
45 graphical models also known as Markov random fields; Murphy 2012) can provide a  
46 framework for understanding the landscape-level consequences of pairwise species  
47 interactions, and for estimating them from observed presence-absence matrices. Markov

*Inferring species interactions*

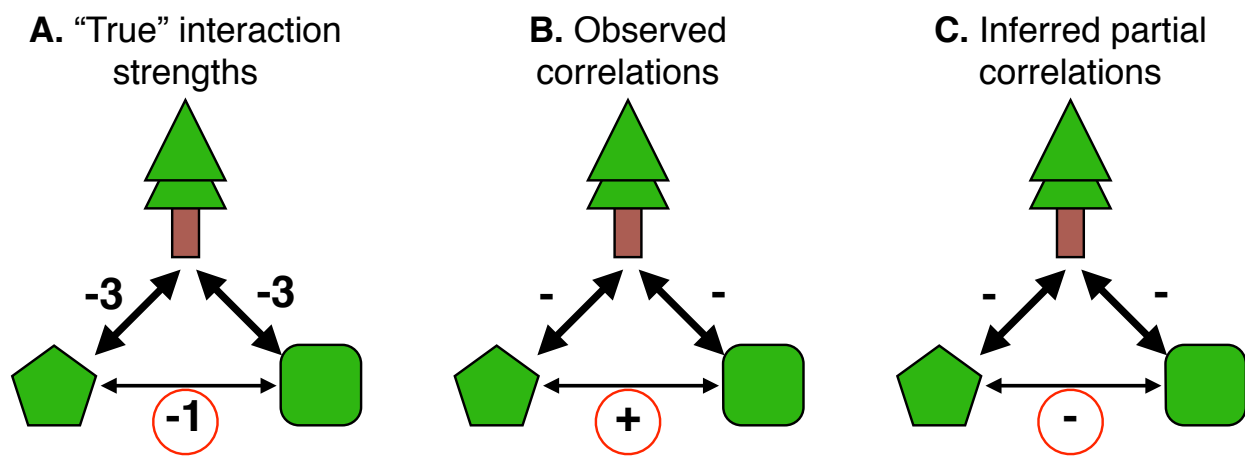

Figure 1: **A.** A small network of three competing species. The tree (top) tends not to co-occur with either of the two shrub species, as indicated by the strongly negative coefficient linking them. The two shrub species also compete with one another, but more weakly (circled coefficient). **B.** In spite of the competitive interactions between the two shrub species, their shared tendency to occur in locations without trees makes their occurrence vectors positively correlated (circled). **C.** Controlling for trees with a conditional (all-else-equal) approach such as a partial covariance or a Markov network leads to correct identification of the negative shrub-shrub interaction (circled).

## *Inferring species interactions*

48 networks have been used in many scientific fields in similar contexts for decades, from  
49 physics (where nearby particles interact magnetically; Cipra 1987) to spatial statistics (where  
50 adjacent grid cells have correlated values; Harris 1974, Gelfand et al. 2005). While  
51 community ecologists explored some related approaches in the 1980's (Whittam and  
52 Siegel-Causey 1981), they used severe approximations that led to unintelligible results (e.g.  
53 “probabilities” greater than one; Gilpin and Diamond 1982).

54 Below, I demonstrate Markov networks' ability to produce exact predictions about the  
55 direct and indirect consequences of an interaction matrix, and also to make inferences about  
56 the species interactions that contributed to an observed set of co-occurrences. Using  
57 simulated data sets where the “true” interactions are known, I compare this approach with  
58 several existing methods. Finally, I discuss opportunities for extending the approach  
59 presented here to other problems in community ecology, e.g. quantifying the overall effect of  
60 species interactions on occurrence rates (Roughgarden 1983) and disentangling the effects of  
61 biotic versus abiotic interactions on species composition (Pollock et al. 2014).

## 62 **Methods**

63 **Markov networks.** Markov networks provide a framework for translating back and forth  
64 between the conditional (all-else-equal) relationships among species (Figure 1C) and the  
65 kinds of species assemblages that these relationships produce. Here, I show how a set of  
66 conditional relationships can determine species composition. Methods for estimating  
67 conditional relationships from data are discussed in the next section.

68 A Markov network defines the relative probability of observing a given vector of  
69 species-level presences (1s) and absences (0s),  $\vec{y}$  at a site, as

$$70 \quad p(\vec{y}; \alpha, \beta) \propto \exp\left(\sum_i \alpha_i y_i + \sum_{\langle ij \rangle} \beta_{ij} y_i y_j\right),$$

## *Inferring species interactions*

71 where the second sum is over all  $\frac{1}{2}n(n-1)$  pairs of  $n$  species. In this model,  $\alpha_i$  is an  
72 intercept term determining the amount that the presence of species  $i$  contributes to the  
73 log-probability of  $\vec{y}$ ; it directly controls the prevalence of species  $i$ . Similarly,  $\beta_{ij}$  is the  
74 amount that the co-occurrence of species  $i$  and species  $j$  contributes to the log-probability; it  
75 controls the conditional relationship between two species, i.e. the probability that they will  
76 be found together, after controlling for the other species in the network (Figure 2A, Figure  
77 2B). For example, if  $\beta_{ij} = +2$ , then each species' odds of occurrence would be  $e^2$  times higher  
78 when the other one is present (as compared with otherwise equivalent sites). The relative  
79 probability of a presence-absence vector increases when positively-associated species co-occur  
80 and decreases when negatively-associated species co-occur. As a result, the model tends—all  
81 else equal—to produce assemblages where many positively-associated species pairs co-occur  
82 and few negatively-associated pairs do (just as an ecologist might expect). When all else is  
83 *not* equal (e.g. Figure 1, where the presence of one competitor is associated with release from  
84 another competitor), then predicting species' overall co-occurrence rates can be more  
85 complicated, and may require summing over the different possible assemblages (Figure 2B).

86 **Estimating  $\alpha$  and  $\beta$  coefficients from presence-absence data.** In the previous  
87 section, the values of  $\alpha$  and  $\beta$  were known and the goal was to make predictions about  
88 possible species assemblages. In practice, however, ecologists will often need to estimate the  
89 parameters from an observed co-occurrence matrix (i.e. from a set of independent  $\vec{y}$  vectors  
90 indicating which species are present at each site on the landscape). When the number of  
91 species is reasonably small (less than about 30), one can find exact maximum likelihood  
92 estimates for all of the  $\alpha$  and  $\beta$  coefficients given a presence-absence matrix by numerically  
93 optimizing  $p(\vec{y}; \alpha, \beta)$ . Fully-observed Markov networks like the ones considered here have  
94 unimodal likelihood surfaces (Murphy 2012), ensuring that this procedure will converge on

*Inferring species interactions*

**A. Defining a small network**

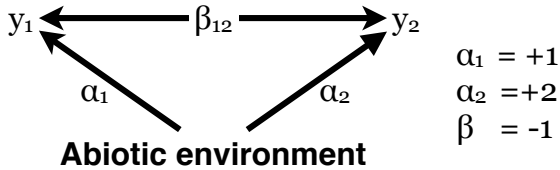

**B. Solving the network**

$$\begin{aligned}
 & \alpha_1 y_1 \quad \alpha_2 y_2 \quad \beta_{y_1 y_2} \\
 P[0 \ 0] &= e^{(+0 \ +0 \ +0)} / Z = e^{(0)} / Z \\
 P[y_1 \ 0] &= e^{(+1 \ +0 \ +0)} / Z = e^{(1)} / Z \\
 P[0 \ y_1] &= e^{(+0 \ +2 \ +0)} / Z = e^{(2)} / Z \\
 P[y_1 y_2] &= e^{(+1 \ +2 \ -1)} / Z = e^{(2)} / Z \\
 & (e^0 + e^1 + e^2 + e^2) / Z = 1
 \end{aligned}$$

**C. Expected co-occurrence rates**

|           |         | Species 1 |         |
|-----------|---------|-----------|---------|
|           |         | Absent    | Present |
| Species 2 | Absent  | 5%        | 15%     |
|           | Present | 40%       | 40%     |

**D. Expected co-occurrence without competition ( $\beta_{12}=0$ )**

|           |         | Species 1 |         |
|-----------|---------|-----------|---------|
|           |         | Absent    | Present |
| Species 2 | Absent  | 3%        | 9%      |
|           | Present | 24%       | 64%     |

Figure 2: **A.** A small Markov network, defined by its  $\alpha$  and  $\beta$  values. The abiotic environment favors the occurrence of each species ( $\alpha > 0$ ), particularly species 2 ( $\alpha_2 > \alpha_1$ ). The negative  $\beta_{12}$  coefficient is consistent with competition between the two species. **B.** The coefficients determine the probabilities of all four possible presence-absence combinations for Species 1 and Species 2.  $\alpha_1$  is added to the exponent whenever Species 1 is present ( $y_1 = 1$ ), but not when it is absent ( $y_1 = 0$ ). Similarly, the exponent includes  $\alpha_2$  only when species 2 is present ( $y_2 = 1$ ), and includes  $\beta_{12}$  only when both are present ( $y_1 y_2 = 1$ ). The normalizing constant  $Z$ , ensures that the four probabilities sum to 1. In this case,  $Z$  is about 18.5. **C.** The expected frequencies of all possible co-occurrence patterns between the two species of interest, as calculated in the previous panel. **D.** Without competition (i.e. with  $\beta_{12} = 0$ , each species would occur more often.

## *Inferring species interactions*

95 the global maximum. I used the *rosalia* package (Harris 2015a) for the R programming  
96 language (R Core Team 2015) to calculate  $p(\vec{y}; \alpha, \beta)$  and its gradients (Murphy 2012); the  
97 package passes these functions to the “BFGS” method in R’s general-purpose optimizer,  
98 which then estimates the Markov network parameters.

99 **Simulated landscapes.** I simulated several sets of landscapes using known parameters to  
100 evaluate different statistical methods’ performance. The first set of landscapes included the  
101 three competing species shown in Figure 1. For each of 1000 replicates, I generated a  
102 landscape with 100 sites by sampling from a probability distribution defined by the figure’s  
103 interaction coefficients (Appendix 1). Each of the methods described below was then  
104 evaluated on its ability to correctly infer that the two shrub species competed with one  
105 another, despite their frequent co-occurrence.

106 I then generated landscapes with up to 20 interacting species at 25, 200, or 1600 sites  
107 using three increasingly complex models (50 replicates for each combination of size and  
108 model; see Appendix 2 for details). I randomly drew the “true” coefficient magnitudes for  
109 each replicate landscape from exponential distributions so that most species pairs interacted  
110 negligibly but a few pairs interacted strongly enough that their effects could propagate  
111 indirectly to other species in the network.

112 The first set of 20-species landscapes, like the landscapes with three species, were  
113 generated directly from a Markov network to ensure that the model could recover the  
114 parameters used to generate the “observed” co-occurrence data. Then, I added two  
115 environmental factors that varied from location to location across the simulated landscapes,  
116 and simulated a new set of co-occurrence data so that species’  $\alpha$  coefficients depended on the  
117 local environment. The latter set of simulated landscapes provide an important test of the  
118 methods’ ability to distinguish co-occurrence patterns that were generated from pairwise

## *Inferring species interactions*

119 biotic interactions from those that were generated by external forces like abiotic  
120 environmental filtering. This task was made especially difficult because—as with most  
121 analyses of presence-absence data for co-occurrence patterns—the inference procedure did  
122 not have access to any information about the environmental or spatial variables that helped  
123 shape the landscape (cf Connor et al. 2013). I generated the final set of landscapes with an  
124 abundance-based model that included per-capita interaction rates instead of per-species  
125 interaction rates.

126 **Recovering species interactions from simulated data.** I compared seven techniques  
127 for determining the sign and strength of the associations between pairs of species from  
128 simulated data (Appendix 3). First, I used the *rosalia* package (Harris 2015a) to fit Markov  
129 network models, as described above. For the analyses with 20 species, a weak regularizer  
130 (equivalent to a logistic prior with scale 2) ensured that the estimates were always finite.

131 I also evaluated six alternative methods: five from the existing literature, plus a novel  
132 combination of two of these methods. The first alternative interaction metric was the sample  
133 correlation between species' presence-absence vectors, which summarizes their marginal  
134 association. Next, I used partial correlations, which summarize species' conditional  
135 relationships. This approach is common in molecular biology (Friedman et al. 2008), but is  
136 rare in ecology (see Albrecht and Gotelli (2001) and Faisal et al. (2010) for two exceptions).  
137 In the context of non-Gaussian data, the partial correlation can be thought of as a  
138 computationally efficient approximation to the full Markov network model (Loh and  
139 Wainwright 2013). Because partial correlations are undefined for landscapes with  
140 perfectly-correlated species pairs, I used a regularized estimate provided by the *corpcor*  
141 package's `pcor.shrink` function with the default settings (Schäfer et al. 2014).

142 The third alternative, generalized linear models (GLMs), also provide a computationally



## *Inferring species interactions*

143 efficient approximation to the Markov network (Lee and Hastie 2012). Following Faisal et al.  
144 (2010), I fit regularized logistic regression models (Gelman et al. 2008) for each species, using  
145 the other species on the landscape as predictors. This produced two interaction estimates for  
146 each species pair; one for the effect of species  $i$  on species  $j$  and one for the reverse. These  
147 two coefficients are not identifiable from the data, however (Schmidt and Murphy 2012), so I  
148 used their average as an overall measure of the pairwise relationship.

149 The next method, described in Gotelli and Ulrich (2009), involved simulating new  
150 landscapes from a null model that retains the row and column sums of the original matrix  
151 (Strong et al. 1984). I used the  $Z$ -scores computed by the Pairs software described in Gotelli  
152 and Ulrich (2009) as my null model-based estimator of species interactions.

153 The last two estimators used the latent correlation matrix estimated by the BayesComm  
154 package (Golding and Harris 2015) in order to evaluate the recent claim that the correlation  
155 coefficients estimated by “joint species distribution models” provide an accurate assessment  
156 of species’ pairwise interactions (Pollock et al. 2014, see also Harris 2015b). In addition to  
157 using the posterior mean correlation (Pollock et al. 2014), I also used the posterior mean  
158 *partial* correlation, which should control better for indirect effects.

159 **Evaluating model performance.** For the simulated landscapes based on Figure 1, I  
160 assessed whether each method’s test statistic indicated a positive or negative relationship  
161 between the two shrubs (Appendix 1). For the null model (Pairs), I calculated statistical  
162 significance using its  $Z$ -score. For the Markov network, I used the Hessian matrix to  
163 generate approximate confidence intervals.

164 For the larger landscapes, I evaluated the relationship between each method’s estimates  
165 and the “true” interaction strengths. To ensure that the different test statistics  
166 (e.g. correlations versus  $Z$  scores) were on a common scale, I rescaled them using linear

## *Inferring species interactions*

167 regression through the origin. I then calculated the proportion of variance explained for  
168 different combinations of model type and landscape size (compared with a null model that  
169 assumed all interaction strengths to be zero).

### 170 **Results**

171 **Three species.** As shown in Figure 1, the marginal relationship between the two shrub  
172 species was positive—despite their competition for space at a mechanistic level—due to  
173 indirect effects of the dominant tree species. As a result, the correlation between these  
174 species was positive in 94% of replicates, and the randomization-based null model falsely  
175 reported positive associations 100% of the time. Worse, more than 98% of these false  
176 conclusions were statistically significant. The partial correlation and Markov network  
177 estimates, on the other hand, each correctly isolated the direct negative interaction between  
178 the shrubs from their positive indirect interaction 94% of the time (although the confidence  
179 intervals overlapped zero in most replicates).

180 **Twenty species.** In general, each model’s performance was highest for large landscapes  
181 with simple assembly rules and no environmental heterogeneity (Figure 3). Despite some  
182 variability across contexts, the rank ordering across methods was very consistent. In  
183 particular, the four methods that controlled for indirect effects (the Markov network, the  
184 generalized linear models, and the two partial correlation-based methods) always matched or  
185 outperformed those that did not. The Markov network consistently performed best of all. As  
186 anticipated by Lee and Hastie (2012), generalized linear models closely approximated the  
187 Markov network estimates (Figure 4A), especially when the data sets were very large (Figure  
188 3). As reviewed in Gotelli and Ulrich (2009), however, most analyses in this field of ecology  
189 involve fewer than 50 sites, and the gap between the Markov network and GLMs is larger in  
190 this context. As shown in Appendix 4, the standard errors associated with the estimates in

### Inferring species interactions

191 Figure 3 are small (less than 0.01), so the differences among methods should not be  
 192 attributed to sampling error.

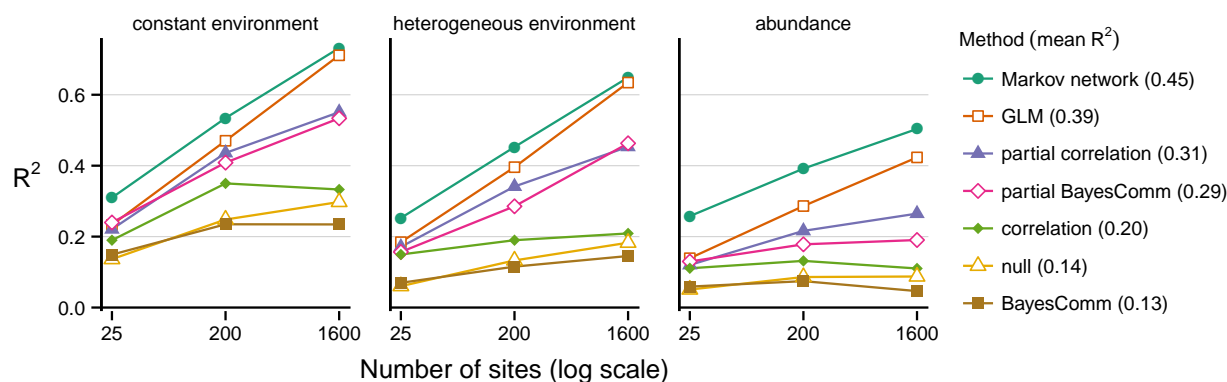

Figure 3: Proportion of variance in interaction coefficients explained by each method versus number of sampled locations across the three simulation types. For the null model (Pairs), two outliers with  $|Z| > 1000$  were manually adjusted to  $|Z| = 50$  to mitigate their detrimental influence on  $R^2$  (Appendix 5).

193 Of the methods that did not control for indirect effects, Figure 3 shows that simple  
 194 correlation coefficients provided a more reliable indicator of species' true interaction  
 195 strengths than either the joint species distribution model (BayesComm) or the null model  
 196 (Pairs). The estimates from these approaches were tightly correlated (after controlling for  
 197 the size of the landscape) suggesting that the null model only contains a noisy version of the  
 198 same information that could be obtained more easily and interpretably with simple  
 199 correlation coefficients (Figure 4B).

200 Finally, we can evaluate the models' statistical inferences (focusing on the first two  
 201 simulation types, for which the true interaction rates are easiest to interpret). The Markov  
 202 network's approximate Type I error rate (defined here as the probability that 0 fell outside  
 203 the 95% confidence interval for a pair of species where  $|\beta_{ij}| < 0.1$ ) depended on the  
 204 simulation type: 0.02 for simulations that matched the model's assumptions, versus 0.14 for  
 205 simulations that included environmental heterogeneity (see Appendix 4 for confidence

*Inferring species interactions*

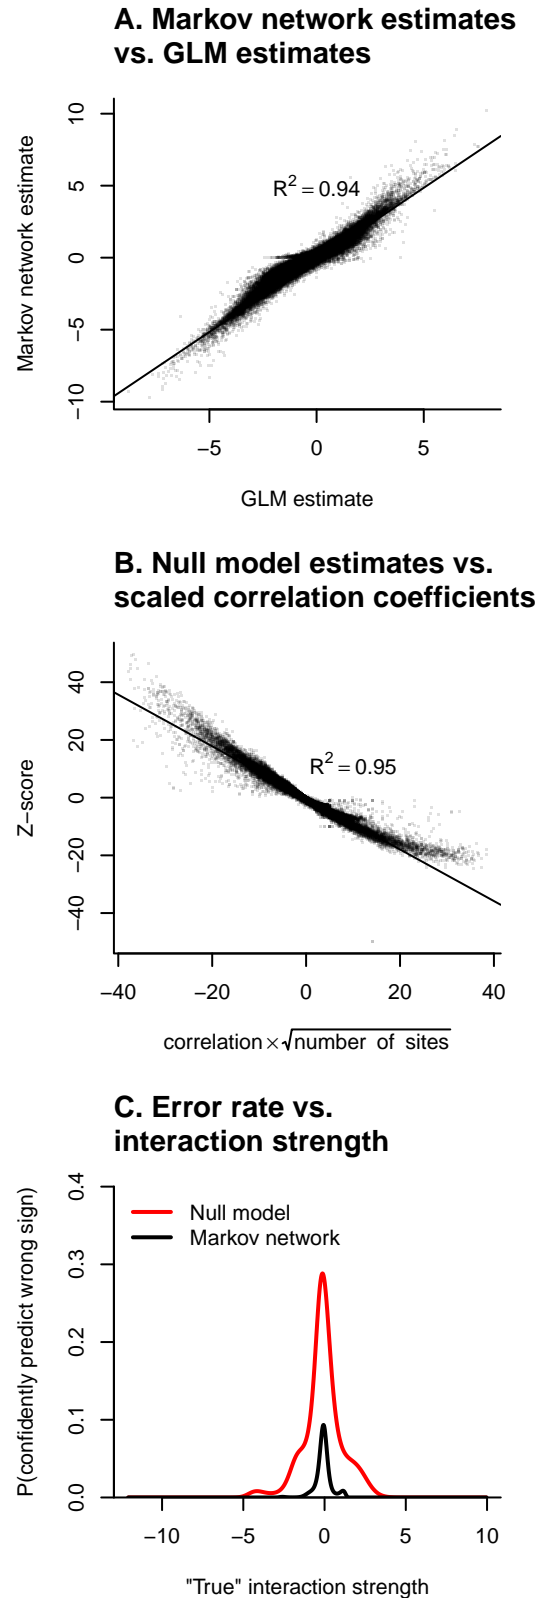

Figure 4: **A.** The Markov network's estimated interaction coefficients were generally very similar to the GLM estimates. **B.** The null model's estimates typically matched the (negative) correlation coefficient, after controlling for landscape size. **C.** For any given interaction strength, the null model was much more likely to misclassify its sign with 95% confidence than the Markov network was.

## *Inferring species interactions*

206 interval coverage across a range of  $\beta_{ij}$  values). The null model's Type I error rates were 0.30  
207 and 0.50 for the constant and heterogeneous landscapes, respectively—far higher than the  
208 nominal 0.05 rate. Figure 4C shows, across a range of true interaction strengths, the  
209 probability that the null model or the Markov network will predict the wrong sign of the  
210 interaction with 95% confidence. The null model makes such errors more than 5 times as  
211 often as the Markov network, even though it only reject the null hypothesis twice as often  
212 overall (Appendix 4). The Markov network's errors were also more concentrated around 0, so  
213 it never misclassified strong interactions like the null model did.

## 214 **Discussion**

215 The results presented above show that Markov networks can reliably recover species'  
216 pairwise interactions from species composition data, even for cases where environmental  
217 heterogeneity and indirect interactions cause ecologists' typical null modeling approaches to  
218 reliably fail. Partial covariances and generalized linear models can both provide  
219 computationally efficient approximations, but with somewhat lower accuracy (especially for  
220 typically-sized data sets with small numbers of sites; Gotelli and Ulrich 2009). The difference  
221 in accuracy may be larger for real data sets than for the simulated landscapes in Figure 3,  
222 however; linear approximations to the Markov network make larger errors when the  
223 interaction matrix is structured (e.g. due to guilds or trophic levels; Loh and Wainwright  
224 2013). Similarly, the separate generalized linear models for each species can severely overfit  
225 in some cases (Lee and Hastie 2012). The full Markov network should thus be preferred to  
226 the approximations when it is computationally tractable.

227 Compositional data only contains enough degrees of freedom to estimate one interaction  
228 per species pair (Schmidt and Murphy 2012), so none of these methods can identify the  
229 exact nature of the pairwise interactions (e.g. which species in a positively-associated pair is

### *Inferring species interactions*

230 facilitating the other). To estimate asymmetric interactions, such as commensalism or  
231 predation, ecologists could use time series, behavioral observations, manipulative  
232 experiments, or natural history. These other sources of information could also be used to  
233 augment the likelihood function with a more informative prior distribution, reducing  
234 ecologists' error and uncertainty relative to Figure 3's results.

235 Despite their limitations, Markov networks have enormous potential to improve  
236 ecological understanding. In particular, they make many fewer errors than existing  
237 approaches, and can make precise statements about the conditions where indirect  
238 interactions will overwhelm direct ones. They also provide a simple answer to the question of  
239 how competition should affect a species' overall prevalence, which has important implications  
240 for community-level modeling (Strong et al. 1984). Specifically, Equation 1 can be used to  
241 calculate the expected prevalence of a species in the absence of biotic influences as  
242  $e^\alpha / (e^0 + e^\alpha)$ . Competition's effect on prevalence can then be estimated by comparing this  
243 value with the observed prevalence (e.g. comparing Figure 2D with Figure 2C). This novel  
244 quantitative result conflicts with most of our null models, which unreasonably assume that  
245 prevalence would be the exactly same in the absence of competition as it is in the observed  
246 data (Roughgarden 1983).

247 Markov networks—particularly the Ising model for binary networks—are very well  
248 understood, having been studied for nearly a century (Cipra 1987). Tapping into this  
249 framework would thus allow ecologists to take advantage of into a vast set of existing  
250 discoveries and techniques for dealing with indirect effects, stability, and alternative stable  
251 states. Numerous extensions to the basic network are possible as well. For example, the  
252 states of the interaction network can be modeled as a function of the local abiotic  
253 environment (Lee and Hastie 2012), which would help incorporate networks of biotic

### *Inferring species interactions*

254 interactions into species distribution models (Pollock et al. 2014) and lead to a better  
255 understanding of the interplay between biotic and abiotic effects on community structure.  
256 Alternatively, models could allow one species to alter the relationship between two other  
257 species (Tjelmeland and Besag 1998, cf Bruno et al. 2003).

258 Finally, the results presented here have important implications for ecologists' continued  
259 use of null models for studying species interactions. Null and neutral models can be useful  
260 for clarifying our thinking (Harris et al. 2011, Xiao et al. 2015), but deviations from a  
261 particular null model must be interpreted with care (Roughgarden 1983). Even in small  
262 networks with three species, it may simply not be possible to implicate specific ecological  
263 processes like competition by rejecting a general-purpose null (Gotelli and Ulrich 2009),  
264 especially when the test statistic is effectively just a correlation coefficient (Figure 4B).  
265 When the non-null backdrop is not controlled for, Type I error rates can skyrocket, the  
266 apparent sign of the interaction can change, and null models can routinely produce  
267 misleading inferences (Figure 1, Figure 4C, Gotelli and Ulrich (2009)).

268 Controlling for indirect effects via simultaneous estimation of multiple ecological  
269 parameters seems like a much more promising approach: to the extent that the models'  
270 relative performance on real data sets is similar to the range of results shown in Figure 3,  
271 scientists in this field could often triple their explanatory power by switching from null  
272 models to Markov networks (or increase it nearly as much with linear or generalized linear  
273 approximations). Regardless of the methods ecologists ultimately choose, controlling for  
274 indirect effects could clearly improve our understanding of species' direct effects on one  
275 another and on community structure.

276 **Acknowledgements:** This work benefited greatly from discussions with A. Sih, M. L.  
277 Baskett, R. McElreath, R. J. Hijmans, A. C. Perry, and C. S. Tysor. Additionally, A. K.

*Inferring species interactions*

278 Barner, E. Baldrige, E. P. White, D. Li, D. L. Miller, N. Golding, N. J. Gotelli, C. F.  
279 Dormann, and two anonymous reviewers provided very helpful feedback on the text. This  
280 research was partially supported by a Graduate Research Fellowship from the US National  
281 Science Foundation and by the Gordon and Betty Moore Foundation's Data-Driven  
282 Discovery Initiative through Grant GBMF4563 to E. P. White.

283 **References:**

- 284 Albrecht, M., and N. J. Gotelli. 2001. Spatial and temporal niche partitioning in grassland  
285 ants. *Oecologia* 126:134–141.
- 286 Azaele, S., R. Munepeerakul, A. Rinaldo, and I. Rodriguez-Iturbe. 2010. Inferring plant  
287 ecosystem organization from species occurrences. *Journal of theoretical biology*  
288 262:323–329.
- 289 Bruno, J. F., J. J. Stachowicz, and M. D. Bertness. 2003. Inclusion of facilitation into  
290 ecological theory. *Trends in Ecology & Evolution* 18:119–125.
- 291 Cipra, B. A. 1987. An introduction to the Ising model. *American Mathematical Monthly*  
292 94:937–959.
- 293 Connor, E. F., M. D. Collins, and D. Simberloff. 2013. The checkered history of  
294 checkerboard distributions. *Ecology* 94:2403–2414.
- 295 Diamond, J. M. 1975. The island dilemma: Lessons of modern biogeographic studies for the  
296 design of natural reserves. *Biological conservation* 7:129–146.
- 297 Faisal, A., F. Dondelinger, D. Husmeier, and C. M. Beale. 2010. Inferring species interaction  
298 networks from species abundance data: A comparative evaluation of various statistical and  
299 machine learning methods. *Ecological Informatics* 5:451–464.
- 300 Friedman, J., T. Hastie, and R. Tibshirani. 2008. Sparse inverse covariance estimation with  
301 the graphical lasso. *Biostatistics* 9:432–441.



*Inferring species interactions*

- 302 Gelfand, A. E., A. M. Schmidt, S. Wu, J. A. Silander, A. Latimer, and A. G. Rebelo. 2005.  
303 Modelling species diversity through species level hierarchical modelling. *Journal of the*  
304 *Royal Statistical Society: Series C (Applied Statistics)* 54:1–20.
- 305 Gelman, A., A. Jakulin, M. G. Pittau, and Y.-S. Su. 2008. A Weakly Informative Default  
306 Prior Distribution for Logistic and Other Regression Models. *The Annals of Applied*  
307 *Statistics* 2:1360–1383.
- 308 Gilpin, M. E., and J. M. Diamond. 1982. Factors contributing to non-randomness in species  
309 Co-occurrences on Islands. *Oecologia* 52:75–84.
- 310 Golding, N., and D. J. Harris. 2015. BayesComm: Bayesian Community Ecology Analysis.  
311 Gotelli, N. J., and W. Ulrich. 2009. The empirical Bayes approach as a tool to identify  
312 non-random species associations. *Oecologia* 162:463–477.
- 313 Harris, D. J. 2015a. Rosalia: Exact inference for small binary Markov networks. R package  
314 version 0.1.0. Zenodo. <http://dx.doi.org/10.5281/zenodo.17808>.
- 315 Harris, D. J. 2015b. Generating realistic assemblages with a Joint Species Distribution  
316 Model. *Methods in Ecology and Evolution*.
- 317 Harris, D. J., K. G. Smith, and P. J. Hanly. 2011. Occupancy is nine-tenths of the law:  
318 Occupancy rates determine the homogenizing and differentiating effects of exotic species.  
319 *The American naturalist* 177:535.
- 320 Harris, T. E. 1974. Contact Interactions on a Lattice. *The Annals of Probability* 2:969–988.
- 321 Lee, J. D., and T. J. Hastie. 2012, May. Learning Mixed Graphical Models.
- 322 Levine, S. H. 1976. Competitive Interactions in Ecosystems. *The American Naturalist*  
323 110:903–910.
- 324 Lewin, R. 1983. Santa Rosalia Was a Goat. *Science* 221:636–639.
- 325 Loh, P.-L., and M. J. Wainwright. 2013. Structure estimation for discrete graphical models:

*Inferring species interactions*

- 326 Generalized covariance matrices and their inverses. *The Annals of Statistics* 41:3022–3049.
- 327 MacArthur, R. H. 1958. Population ecology of some warblers of northeastern coniferous  
328 forests. *Ecology* 39:599–619.
- 329 Murphy, K. P. 2012. *Machine Learning: A Probabilistic Perspective*. The MIT Press.
- 330 Pollock, L. J., R. Tingley, W. K. Morris, N. Golding, R. B. O’Hara, K. M. Parris, P. A. Vesk,  
331 and M. A. McCarthy. 2014. Understanding co-occurrence by modelling species  
332 simultaneously with a Joint Species Distribution Model (JSDM). *Methods in Ecology and*  
333 *Evolution*:n/a–n/a.
- 334 R Core Team. 2015. *R: A Language and Environment for Statistical Computing*. R  
335 Foundation for Statistical Computing, Vienna, Austria.
- 336 Roughgarden, J. 1983. *Competition and Theory in Community Ecology*. The American  
337 Naturalist 122:583–601.
- 338 Schäfer, J., R. Opgen-Rhein, V. Zuber, M. Ahdesmäki, A. P. D. Silva, and K. Strimmer.  
339 2014. Corpcor: Efficient Estimation of Covariance and (Partial) Correlation.
- 340 Schmidt, M., and K. Murphy. 2012. Modeling Discrete Interventional Data using Directed  
341 Cyclic Graphical Models. arXiv preprint arXiv:1205.2617.
- 342 Strong, D. R., D. Simberloff, L. G. Abele, and A. B. Thistle. 1984. *Ecological communities:*  
343 *Conceptual issues and the evidence*. Princeton University Press.
- 344 Tjelmeland, H., and J. Besag. 1998. Markov Random Fields with Higher-order Interactions.  
345 *Scandinavian Journal of Statistics* 25:415–433.
- 346 Veech, J. A. 2013. A probabilistic model for analysing species co-occurrence. *Global Ecology*  
347 *and Biogeography* 22:252–260.
- 348 Whittam, T. S., and D. Siegel-Causey. 1981. Species Interactions and Community Structure  
349 in Alaskan Seabird Colonies. *Ecology* 62:1515–1524.

*Inferring species interactions*

---

- 350 Xiao, X., D. J. McGlinn, and E. P. White. 2015. A strong test of the Maximum Entropy  
351 Theory of Ecology. *The American Naturalist* 185:E70–E80.
